# Supplementary material
Source: PubMed Central journal article supplement (PMC5461095)

# Supplementary Figure 1

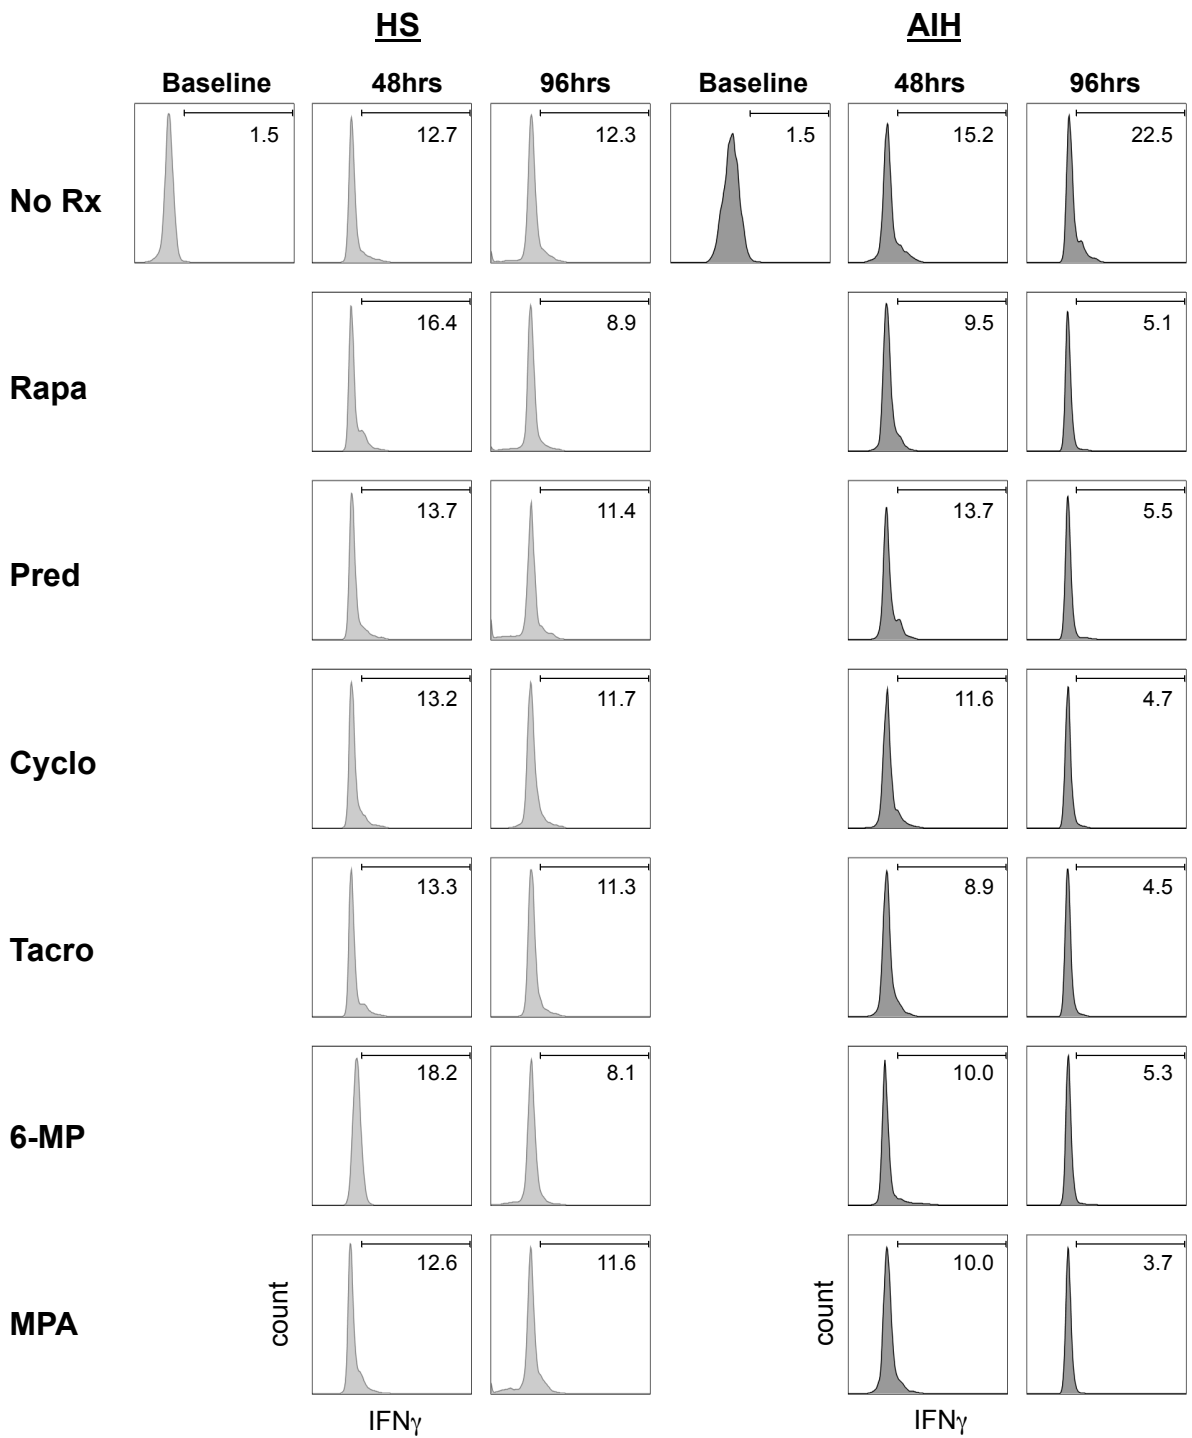

# Supplementary Figure 2

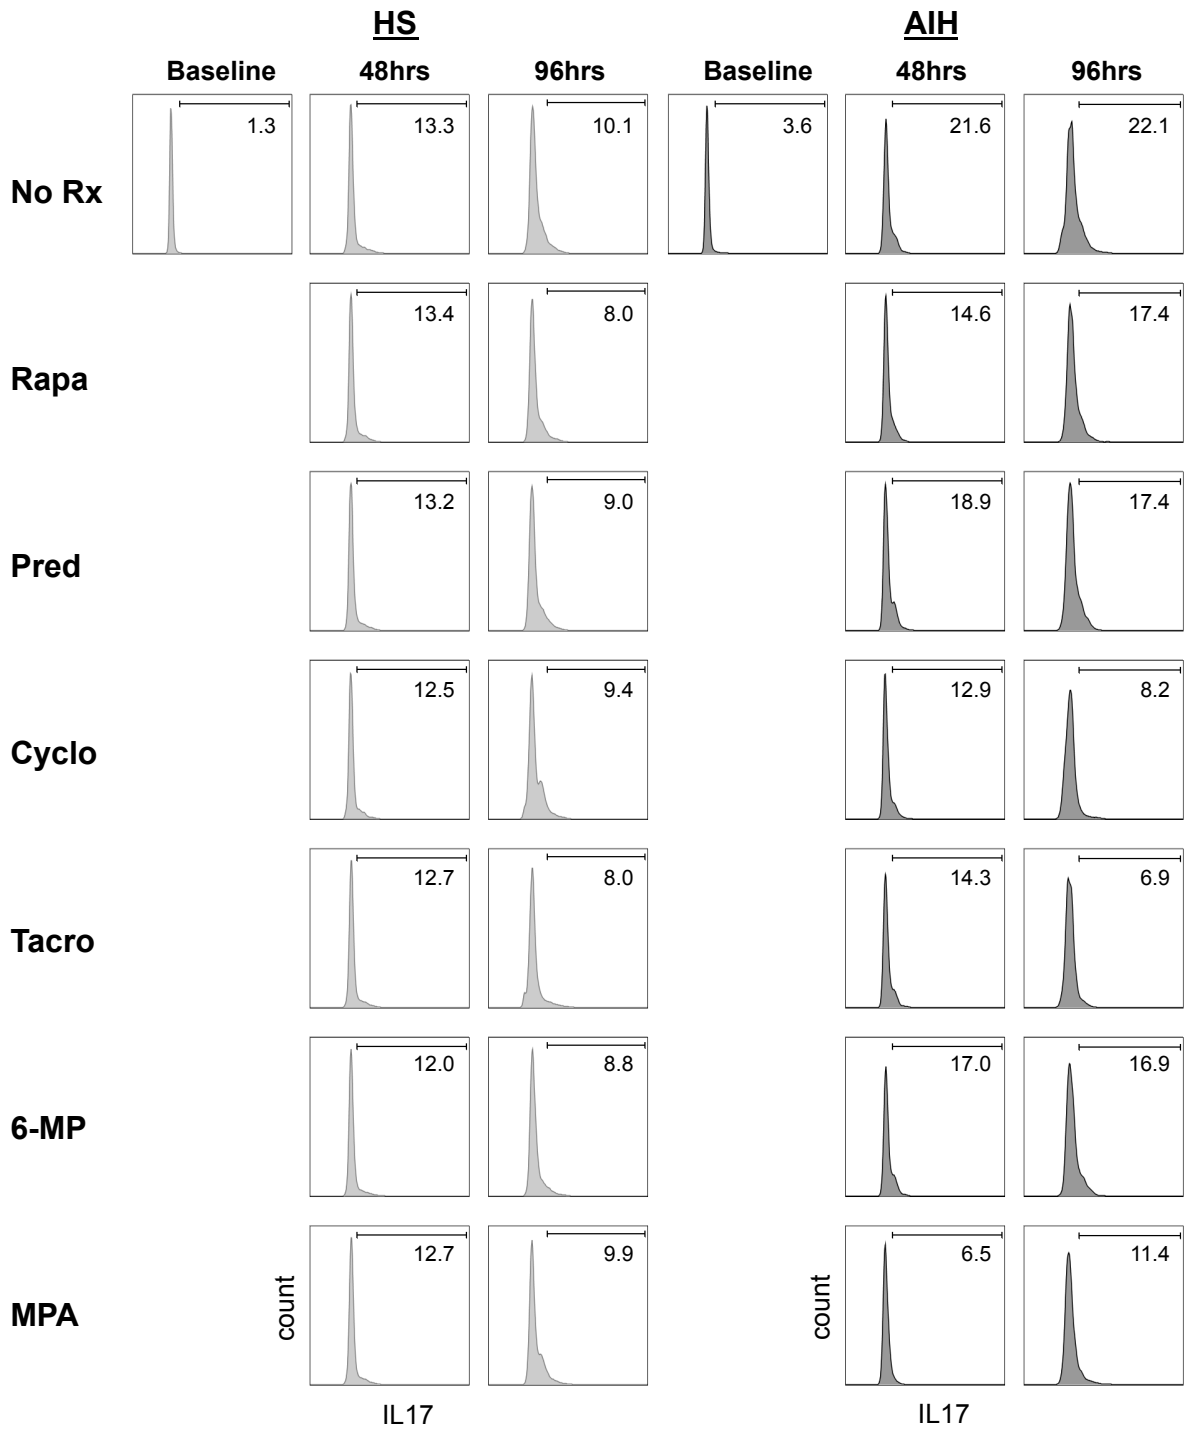

# Supplementary Figure 3

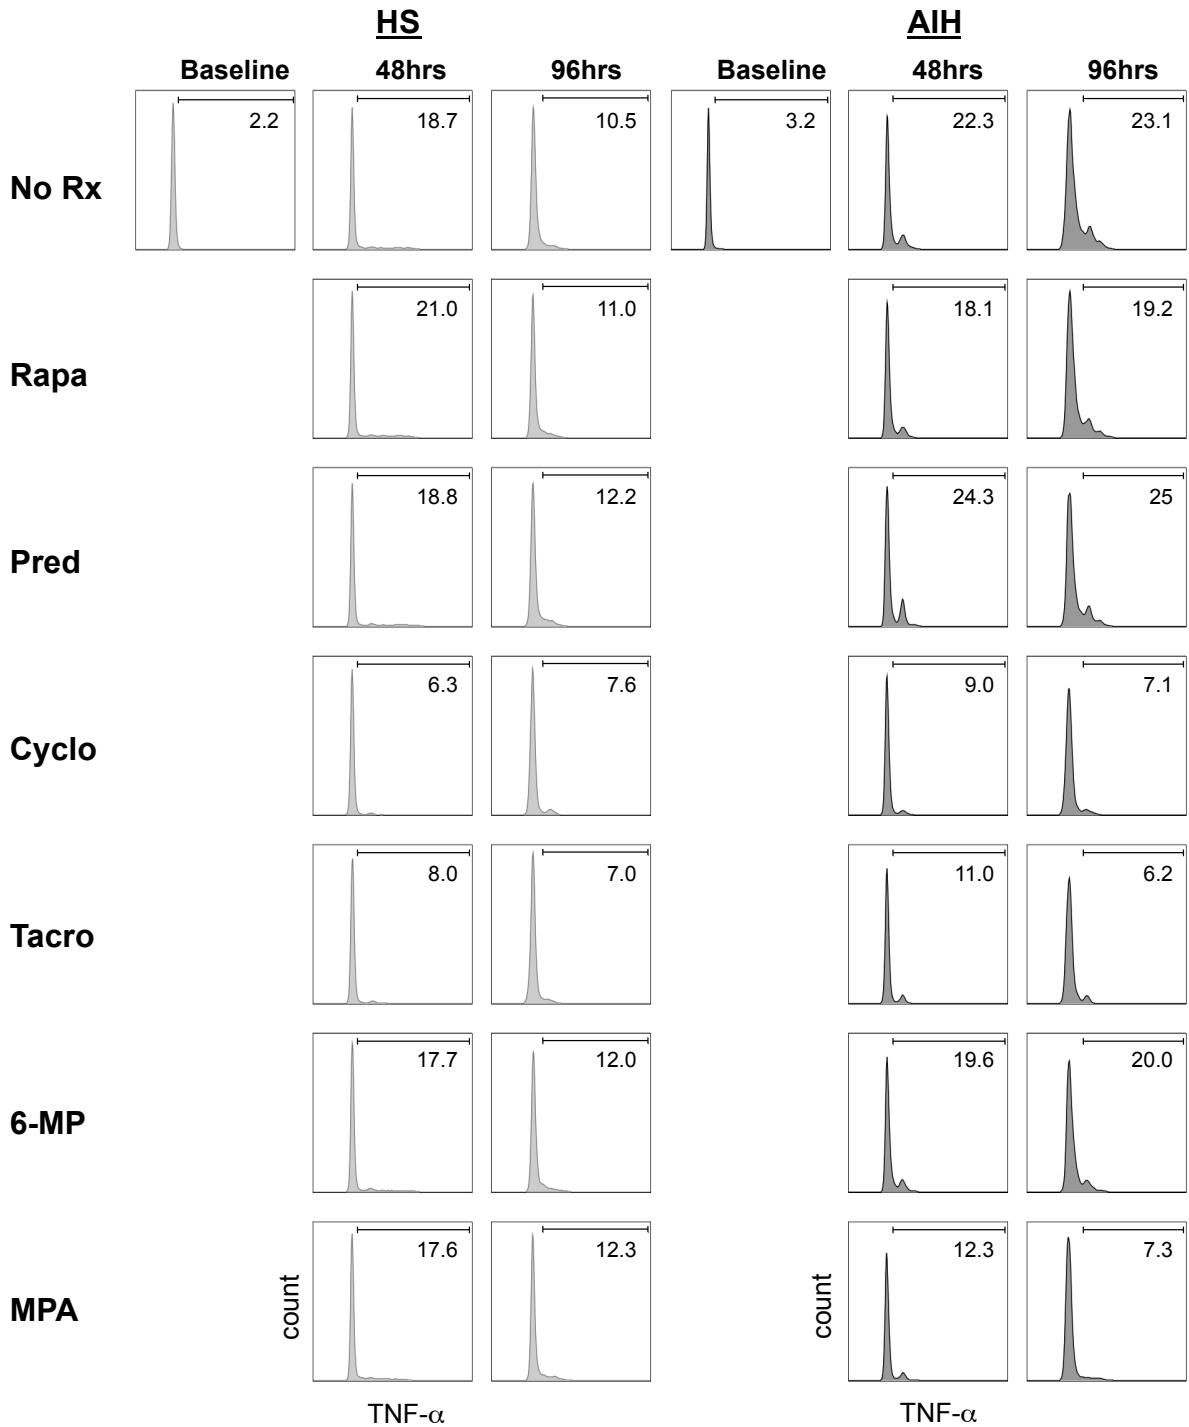

# Supplementary Figure 4

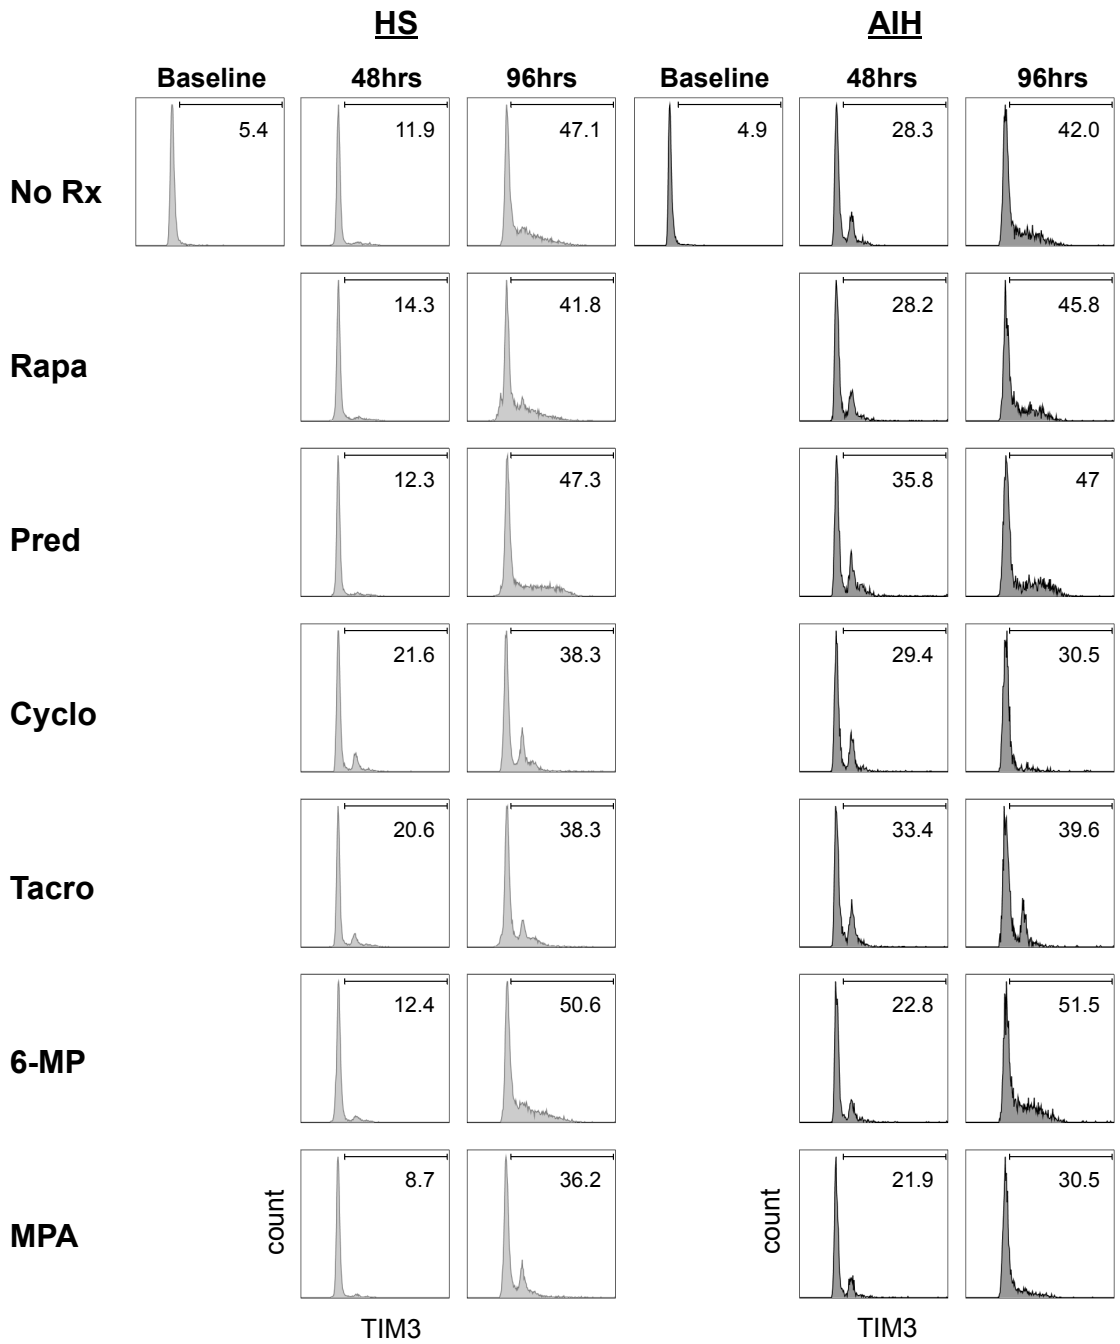

# Supplementary Figure 5

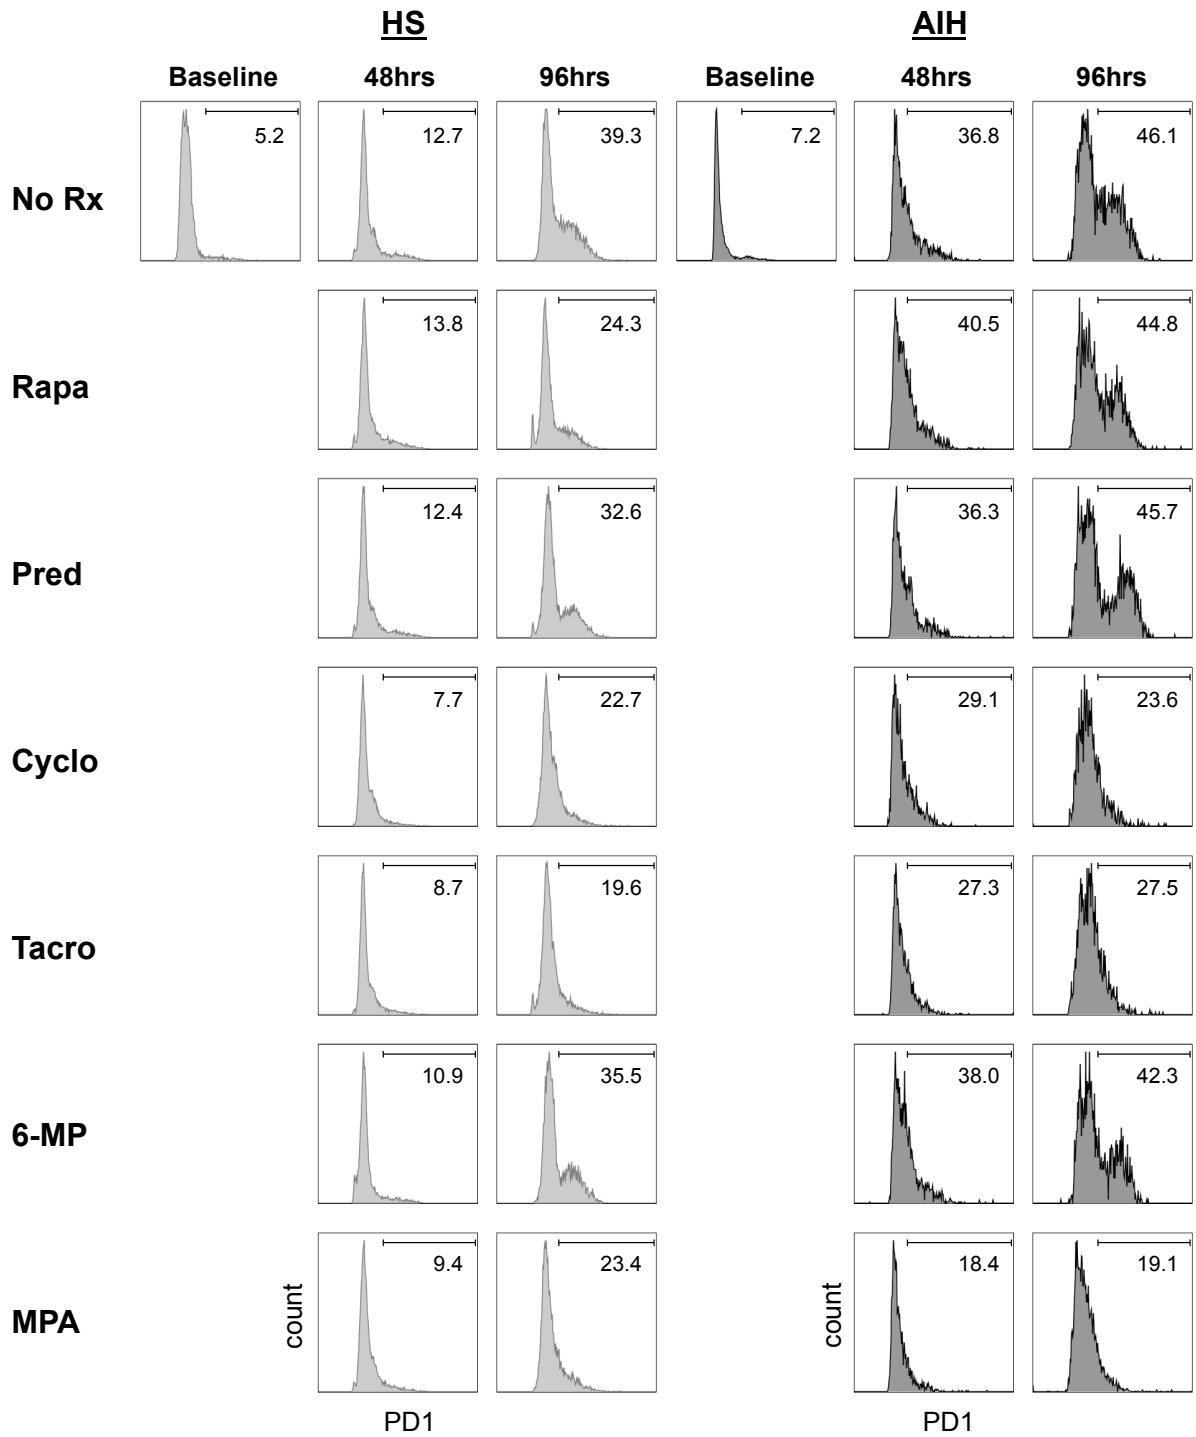

# Supplementary Figure 6

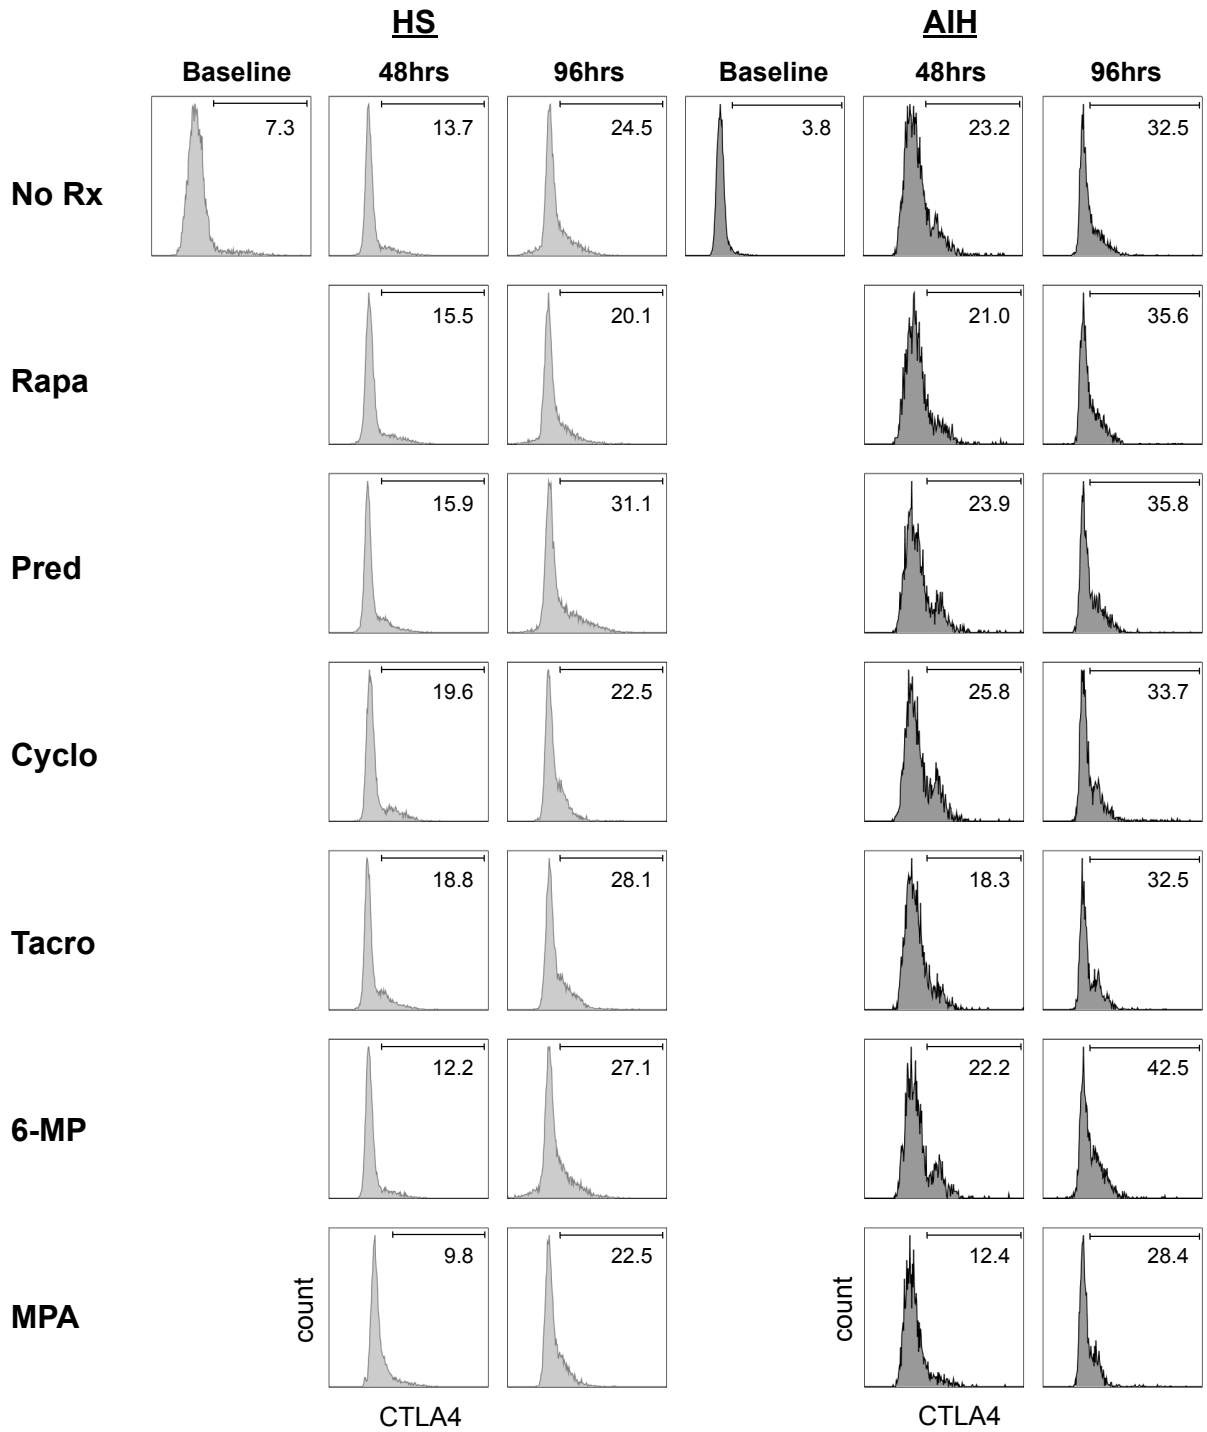

Supplement: CEI-189-71-s001.pdf [file CEI-189-71-s001.pdf]
